# Supplementary material for: Response of primary root to nitrogen-doped carbon dots in Arabidopsis thaliana: alterations in auxin level and cell division activity
Source: Royal Society of Chemistry journal article supplement (doi:10.1039/d1en00168j), 2021-01-01
Supplement: d1en00168j1.pdf [file d1en00168j1.pdf]

## Supplementary materials

### Response of primary root to nitrogen-doped carbon dots in *Arabidopsis thaliana*: Alterations in auxin level and cell division activity

#### The procedure for the determination of the fluorescence quantum yields

Fluorescence quantum yields of the N-CDs were obtained by using the comparative method. The quantum yield of N-CDs,  $\Phi_x$ , is calculated according to the following equation:

$$\Phi_x = \Phi_{\text{std}} \left( \frac{F_x}{F_{\text{std}}} \right) \left( \frac{A_{\text{std}}}{A_x} \right) \left( \frac{n_x}{n_{\text{std}}} \right)^2$$

Where  $\Phi$ ,  $F$ ,  $A$ , and  $n$  are quantum yield, integral of the fluorescence emission scan, absorbance, and refractive index, respectively. The subscript “x” denotes the type of sample to be analyzed (i.e., N-CDs). The subscript “std” refers to the standard fluorophore of known quantum yield, for an example, quinine sulfate used in present work (The quantum yield of quinine sulfate dissolved in 0.1 M H<sub>2</sub>SO<sub>4</sub> is 0.54.).

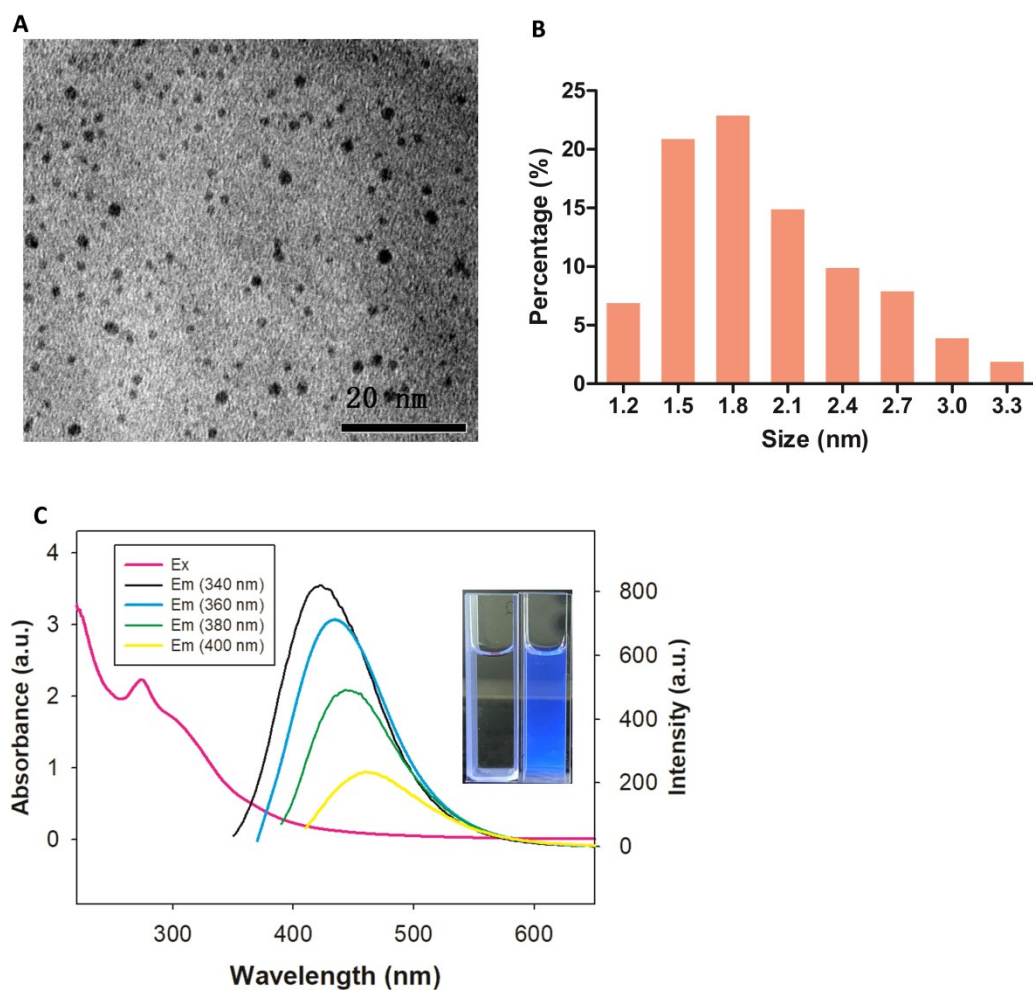

**Figure S1.** The morphology and characterization of N-CDs. **(A)** TEM image of N-CDs. **(B)** Size frequency distribution of N-CDs. **(C)** UV/Vis absorption and PL spectra of N-CDs at different excitation wavelengths (inset: pure water (left) and N-CDs aqueous solution (right) under UV irradiation (365nm)).

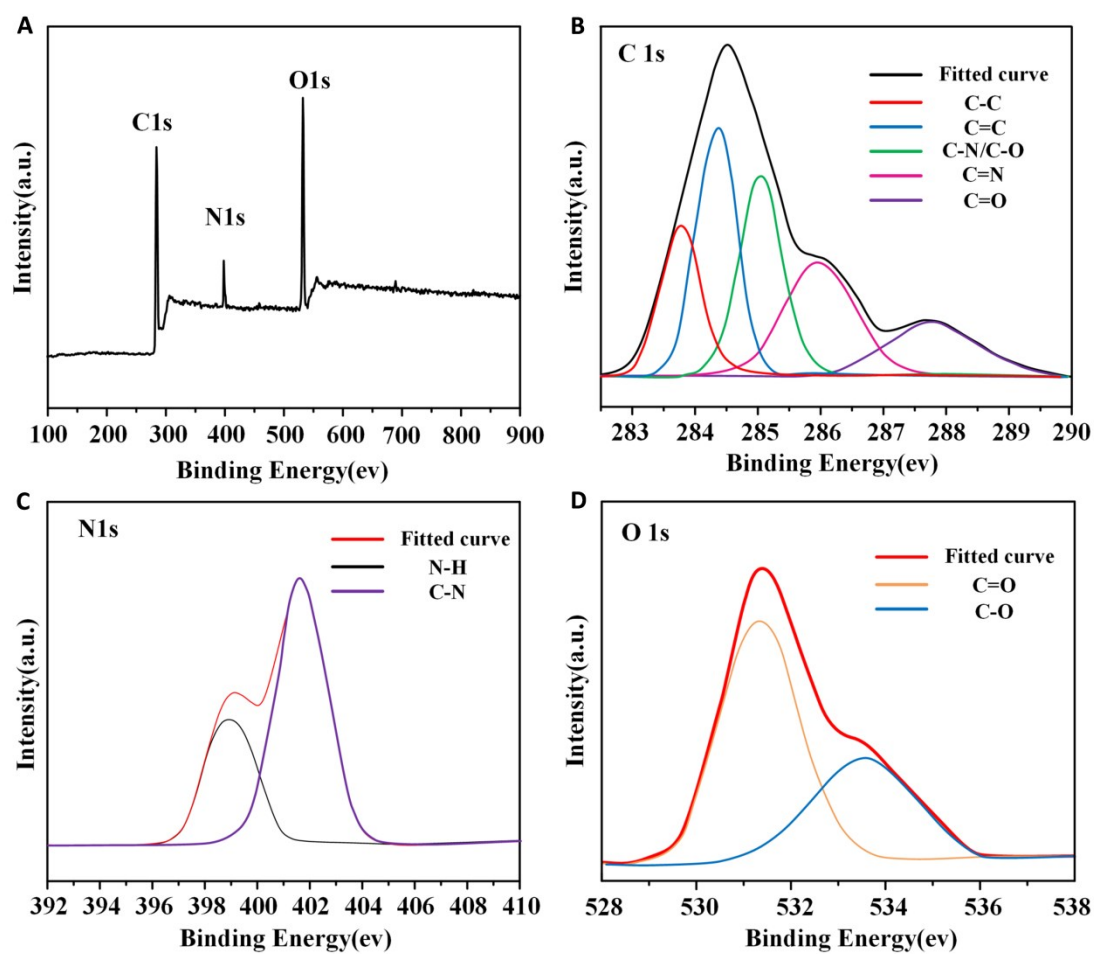

**Figure S2.** (A) XPS spectrum and high resolution XPS spectra of (B) C 1s, (C) N 1s and (D) O 1s of the N-CDs.

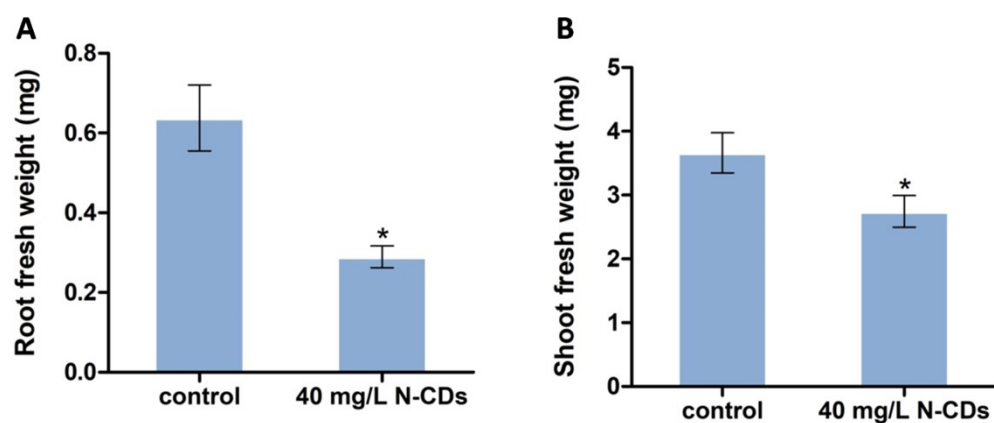

**Figure S3.** The effects of N-CDs on fresh weights of different *Arabidopsis* parts. (A)

The fresh weight of the *Arabidopsis* root after 4 days of incubation. (B) The fresh

weight of the *Arabidopsis* shoot after 4 days of incubation. The values were given as the mean  $\pm$  SD of triplicate samples. Asterisks represent significant difference at  $p < 0.05$  compared to the control.

**Table S1. Primers for qRT-PCR.**

| Gene name       | Forward                  | Reverse                  |
|-----------------|--------------------------|--------------------------|
| <i>YUC2</i>     | CAAGATCAAATGCGGAAAGACT   | CCGAATAATGCATTACCCGTTT   |
| <i>YUC3</i>     | ATGATGAGACGTTCTGGGCTG    | CGTTGCCACCACAATCCATC     |
| <i>YUC5</i>     | TCTGGCGCATCAAGACAACA     | TCACCTCGCCTTCAAACCTCC    |
| <i>YUC9</i>     | CTCGTAGATGGTCAGAAGCTAG   | AATGTCTTGAGCGATGTTAACG   |
| <i>SURI</i>     | GAGATCTTCCGCACAAGTTAAC   | CAATGGCTTCGATACCTTCAAG   |
| <i>CYP79B2</i>  | GAAAGTTGTGATGACGGAAGCTC  | GCATTTCCACAGTAATGCCTAG   |
| <i>AMI1</i>     | TCTGAACTGATAACGGCTCTTT   | AAAACCGTCTGAGCCATACTTA   |
| <i>ASA1</i>     | CTCTGAGAAATGGAACCTGAT    | ATGCTTTCTTTTCCACGTGATC   |
| <i>Histone4</i> | GATTCGTCGTCTTGCTCGTAG    | CAGTCACCGTCTTCCTCCTC     |
| <i>E2Fa</i>     | ACCATCCACCGTCATCTC       | GCTCCTGTCGTTATTATTACTG   |
| <i>CYCB1;1</i>  | CTCAAAATCCCACGCTTCTTGTGG | CACGTCTACTACCTTTGGTTTCCC |
| <i>WEE1</i>     | TGGTGCTGGACATTTCAGTCGG   | CAAGAGCTTGCACTTCCATCATAG |
| <i>CDC25</i>    | GCTCGTTTGATGACAAGATCTC   | GCGTTCCAAGATCATGATGTTT   |
| <i>WOX5</i>     | TCTCCGTGAAAGGTCGAAGC     | GGAGTTCTAAGACCGGCTCG     |
| <i>MSH2</i>     | TCTGACTAGGCGAGTTCTT      | CACCTCTCCAGGGAATCA       |
| <i>MSH6</i>     | ATTAGTTAGAAAGGGCTATCGGG  | AACAACCTGCACATACTTCGC    |
